# Supplementary material for: Hyphenated mass spectrometry methods for enlarged capacity data storage systems based on chemical mixtures
Source: Royal Society of Chemistry journal article supplement (doi:10.1039/d5an00353a), 2025-01-01
Supplement: d5an00353a2.zip [file d5an00353a2.zip]

## Sheet: Full1
CODE 1
Text
Universitat Jaume I
	Set of 152 metabolites used for text encoding
				binary encoding
	Compound	formula	[M-H]- ion (m/z)	vial1	retention time (min)
1	aminolevulinic acid	C5H9NO3	130.05	0	1.1
2	chlorogenic acid	C16H18O9	353.087	1	0.98
3	salicylic acid	C7H6O3	137.024	0	1.27
4	cinnamic acid	C9H7O2	147.045	1	3.19
5	serine	C3H7NO3	104.035	0	0.88
6	silibin	C25H22O10	481.113	1	3.3
7	jasmonate-isoleucine	C18H29NO4	322.202	0	4.9
8	galangin	C15H10O5	269.045	1	4.78
9	12-oxo-phytodienoic acid (OPDA)	C18H28O3	291.196	0	3.14
10	caffeic Acid	C9H8O4	179.034	1	1.24
11	ferulic Acid	C10H10O4	193.05	1	1.86
12	aspartic acid	C4H7NO4	132.03	0	2.01
13	jasmonic Acid	C12H18O3	209.118	1	3.53
14	biochanin A	C16H12O5	283.061	1	4.72
15	kaempferol	C15H10O6	285.04	1	3.44
16	homocysteine	C4H9NO2S	134.028	0	0.55
17	glutamic acid	C5H9NO4	146.045	0	1.34
18	6-hydroxiflavone	C15H10O3	237.055	1	4.05
19	abscisic Acid	C15H20O4	263.128	1	2.89
20	methionine	C5H11NO2S	148.043	0	0.99
21	calycosin	C16H12O5	283.061	1	4.62
22	orotic acid	C5H4N2O4	155.009	0	1.38
23	phenylalanine	C9H11NO2	134.071	0	1.25
24	Icaritin	C21H20O6	367.118	1	6.71
25	adipic acid	C6H10O4	145.05	0	1.83
26	neohesperidin	C28H34O15	609.182	1	2.38
27	genistein	C15H10O5	269.045	1	3.34
28	baicalin	C21H18O11	445.077	1	2.56
29	gluconic acid	C6H12O7	195.05	0	1.65
30	naringenin	C15H12O5	271.061	1	3.85
31	formononetin	C16H12O4	267.066	1	4
32	malic acid	C4H6O5	133.137	0	0.99
33	malonic acid	C3H3O4	101.995	0	1.06
34	diosmetin	C16H12O6	299.056	1	3.49
35	neohesperidin dihydrochalcone	C28H36O15	611.198	1	2.79
36	succinic acid	C6H4O6	117.019	0	1.19
37	fumaric acid	C4H4O4	115.003	0	1.07
38	theaflavin-3'-gallate	C36H28O16	715.13	1	2.89
39	maleic acid	C4O4H4	115.003	0	1.41
40	amentoflavone	C30H18O10	537.082	1	3.9
41	indole acetic acid	C10H9NO2	174.055	0	1.85
42	leucoside	C26H28O15	579.135	1	1.82
43	mirificin	C26H28O13	547.145	1	1.23
44	brazilin	C16H14O5	285.076	1	1.28
45	abscisic acid-d6	C15H14O4D6	269.165	0	2.89
46	cysteine	C3H7NO2S	120.012	0	1.75
47	morusin	C25H24O6	419.149	1	7.06
48	glucosyl salicylate	C13H16O8	299.077	0	1.12
49	tartaric acid	C4H6O6	149.009	0	0.85
50	genkwanin	C16H12O5	283.061	1	4.83
51	didymin	C28H34O14	593.187	1	3.02
52	5,7-dihydroxychromone	C9H6O4	177.019	1	2.1
53	salicylic glucosyl ester	C13H16O8	299.077	0	0.95
54	ketoglutaric acid		145.01	0	1.19
55	Isorhamnetin 3-O-neohesperidin	C28H32O16	623.161	1	1.87
56	scutellarein	C15H10O6	285.04	1	2.52
57	abscisic acid D-glucopyranosyl ester	C21H30O9	425.181	0	1.29
58	(-)-epicatechin gallate	C22H18O10	441.082	1	1.81
59	wogonoside	C22H20O11	459.093	1	3.13
60	galacturonic acid	C6H10O7	193.034	0	0.9
61	lysionotin	C18H16O7	343.082	1	4.69
62	gibberellic acid	C19H22O6	345.134	0	3.69
63	4-aminobenzoic acid	C7H7NO2	136.04	0	0.92
64	epicatechin	C15H14O6	289.071	1	1.27
65	folic acid	C19H19N7O6	440.13	0	2.65
66	alpinetin	C16H14O4	269.081	1	3.65
67	2-O-galloylhyperin	C28H24O16	615.099	1	1.81
68	isoxanthohumol	C21H22O5	353.139	1	4.22
69	taurine	C2H7NO3S	124.007	0	0.65
70	rhoifolin	C27H30O14	577.156	1	1.86
71	dihydrojasmonic acid	C12H20O3	211.133	0	3.61
72	2-pyrrolidone-5-carboxylic acid	C5H7NO3	128.035	0	0.78
73	hippuric acid	C9H9NO3	178.05	0	1.26
74	gallocatechin gallate	C22H18O11	457.077	1	1.36
75	isoquercetin	C21H20O12	463.088	1	1.83
76	sinapic acid	C11H12O5	223.061	0	3.56
77	shikimic acid	C7H10O5	173.045	0	1.56
78	N-acetyl-L-aspartic acid	C6H9NO5	174.04	0	0.85
79	3-dehidroshikimic acid	C7H8O5	171.037	0	0.65
80	farrerol	C17H16O5	299.092	1	4.37
81	vanilin	C8H8O3	151.04	0	1.16
82	kuwanon G	C40H36O11	691.218	1	5.35
83	isobavachin	C20H20O4	323.128	1	4.6
84	neobavaisoflavone	C20H18O4	321.113	1	4.89
85	nicotiflorin	C27H30O15	593.151	0	3.98
86	spinosin	C28H32O15	607.166	1	1.72
87	briboflavin	C17H20N4O6	375.013	0	2.75
88	pipecolic acid	C6H11NO2	128.071	0	1.75
89	2-aminoadipic acid	C6H11NO4	160.061	0	0.58
90	salicylhydroxamic acid	C7H7NO3	152.035	0	0.78
91	plantagoside	C21H22O12	465.103	1	1.77
92	salicylic acid-d5	C7HD5O3	142.055	0	1.27
93	narcissoside	C28H32O16	623.161	0	2.45
94	puerarin 6-O-xyloside	C26H28O13	547.145	0	1.48
95	kaempferol 3-glucorhamnoside	C27H30O15	593.151	0	3.58
96	nepitrin	C22H22O12	477.103	0	3.57
97	irigenin	C18H16O8	359.077	0	4.38
98	narirutin	C27H32O14	579.171	1	2.08
99	7,8-dihydroxyflavone	C15H10O4	253.05	0	3.48
100	sylimarine	C25H22O10	481.113	0	3.53
101	eriodictyol	C15H12O6	287.056	1	2.83
102	scopoletin	C10H8O4	191.034	0	4.32
103	eriocitrin	C27H32O15	595.166	1	1.77
104	mosloflavone	C17H14O5	297.076	0	3.56
105	pinocembrin	C15H12O4	255.066	0	3.76
106	schaftoside	C26H28O14	563.14	1	1.44
107	homoplantaginin	C22H22O11	461.108	1	2.31
108	daidzein	C15H10O4	253.05	0	3.32
109	5-hydroxy-7,8-dimethoxyflavone	C17H14O5	297.076	0	3.76
110	5,7-dimethoxiflavone	C17H14O4	281.081	0	3.89
111	liquiritigenin	C15H12O4	255.066	0	3.02
112	herbacetin	C15H10O7	301.035	1	2.71
113	4',7-dimethoxyisoflavone	C17H14O4	281.081	0	3.75
114	tectoridin	C22H22O11	461.108	1	2
115	taxifolin	C15H12O7	303.05	1	1.92
116	kaempferitrin	C27H30O14	577.156	1	2.16
117	tangeretin	C20H20O7	371.113	0	4.01
118	astilbin	C21H22O11	449.108	1	1.94
119	calycosin-7-O-beta-D-glucoside	C22H22O10	445.113	0	3.8
120	chrysosptertin B	C19H18O8	373.092	1	4.58
121	epimedin B	C38H48O19	807.271	0	4.25
122	jaceosidin	C17H14O7	329.066	1	3.57
123	apigenin-7-glucuronide	C21H18O11	445.077	1	2.14
124	cimifugin	C16H18O6	305.103	0	2.74
125	7,2'-dihydroxy-3',4'-dimethoxyisoflavane-7-O-glucoside	C23H28O10	463.16	1	3.03
126	guaijaverin	C20H18O11	433.077	1	1.99
127	ononin	C22H22O9	429.119	0	4.12
128	astragalin	C21H20O11	447.093	1	2.09
129	linarin	C28H32O14	591.171	0	4.89
130	corylifol A	C25H26O4	389.175	1	6.61
131	quercetin-3-O-sophoroside	C27H30O17	625.14	1	1.43
132	epimedin C	C39H50O19	821.287	0	4.39
133	epimedin A	C39H50O20	837.282	0	4.25
134	4-hydroxychalcone	C15H12O2	223.076	1	4.53
135	isosinensetin	C20H20O7	371.113	0	3.54
136	hesperetin	C16H14O6	301.071	1	3.26
137	oroxin A	C21H20O10	431.098	0	3.59
138	Irisflorentin	C20H18O8	385.092	0	4.89
139	casanthranol	C21H22O10	433.113	1	2.23
140	baohuoside I	C27H30O10	513.176	0	4.02
141	glucosylvitexin	C27H30O16	609.146	0	5.35
142	isovitexin	C21H20O10	431.098	0	3.65
143	typhaneoside	C34H42O20	769.219	0	4.11
144	vitexin	C21H20O10	431.098	0	3.45
145	vaccarin	C32H38O19	725.193	0	3.67
146	dihydromyricetin	C15H12O8	319.045	1	1.4
147	rutin	C27H30O16	609.145	0	4.23
148	medroxyprogesterone acetate	C24H34O4	385.238	0	5.11
149	myricetin	C15H10O8	317.03	1	2.3
150	naringin	C27H32O14	579.171	0	2.67
151	ampelopsin	C15H12O8	319.045	0	3.85
152	glabridin	C20H20O4	323.128	1	5.11
